# Supplementary material for: Hypoxic repression of pyruvate dehydrogenase activity is necessary for metabolic reprogramming and growth of model tumours
Source: PubMed Central journal article supplement (PMC4976358; doi:10.1038/srep31146), 2016-08-08
Supplement: srep31146-s1.pdf [file srep31146-s1.pdf]

# **Hypoxic repression of pyruvate dehydrogenase activity is necessary for metabolic reprogramming and growth of model tumours**

Tereza Golias, Ioanna Papandreou, Ramon Sun, Bhavna Kumar, Nicole V Brown, Benjamin J Swanson, Reetesh Pai, Diego Jaitin, Quynh-Thu Le, Theodoros N Teknos, and Nicholas C Denko\*

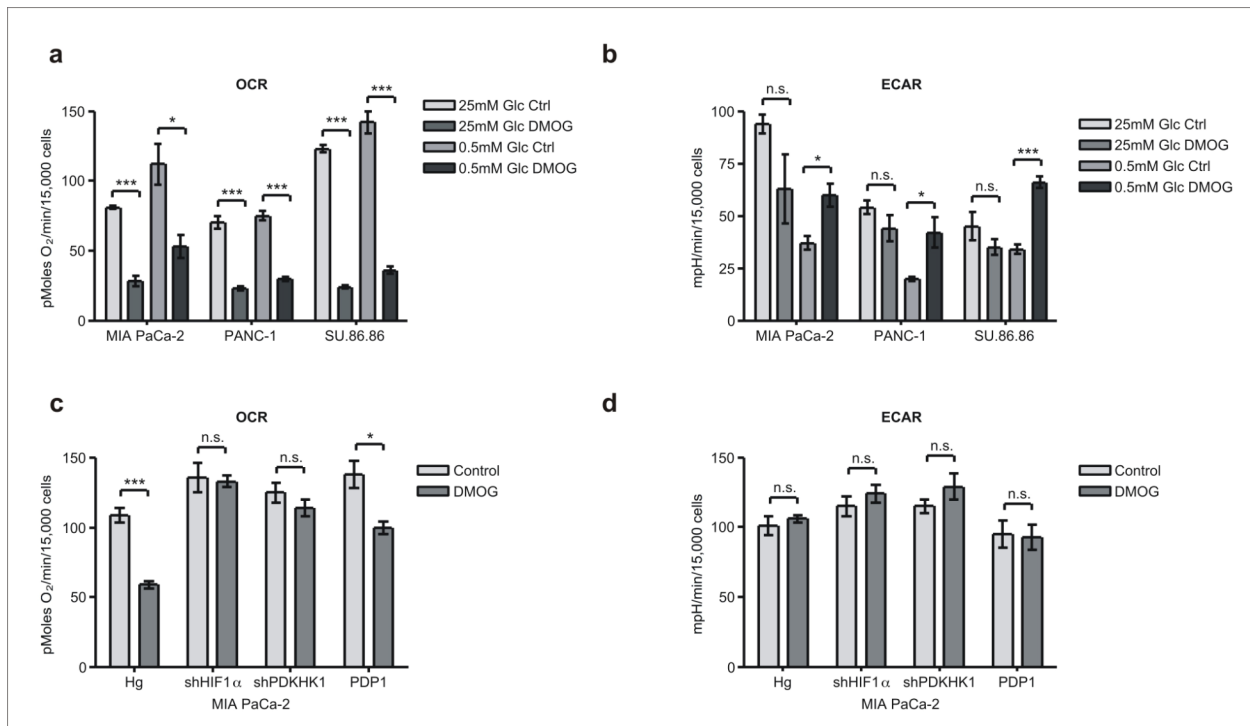

**Supplementary Figure S1 (a)** Oxygen consumption rates (OCR) measured by Seahorse XF in MIA PaCa-2, PANC-1, and SU.86.86 cell lines in high (25mM) or low (0.5mM) glucose incubated overnight with or without 1mM DMOG. **(b)** Extracellular acidification rates (ECAR) of the same samples as in (a). **(c)** Oxygen consumption rates of modified MIA PaCa-2 cells incubated with or without 1 mM DMOG overnight showing modification of hypoxic OCR. **(d)** Extracellular acidification rates of the same samples as in (c). (All data presented as mean  $\pm$  SEM, two-tailed Student's t-test, \* p < 0.05, \*\*\* p < 0.001)

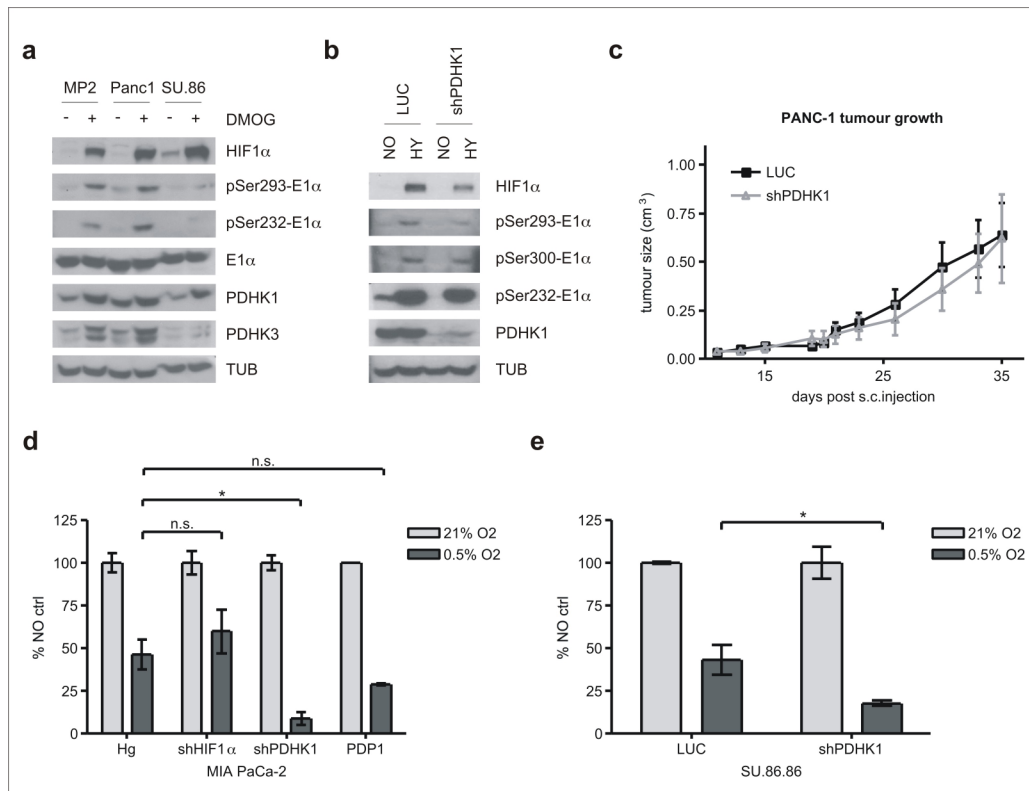

**Supplementary Figure S2 (a)** Western blots of hypoxia-regulated PDHK1 and PDHK3, and phosphorylated inhibitory serine residues on E1 $\alpha$  of PDH in pancreatic cancer cell lines incubated with 0.1% DMSO or 1mM DMOG overnight. **(b)** Western blots of PANC-1 control (LUC) and PDHK1 knocked-down (shPDHK1) cells incubated at 21% or 0.5% O<sub>2</sub> overnight showing that remaining PDHK1 in the silenced cells is still fully able to phosphorylate PDH E1 $\alpha$ . **(c)** When PANC-1 cells from (b) were used to grow xenografts, the growth curves show no difference between control and PDHK1 knock-downs supporting the notion that it is PDHK1 regulation of PDH activity that is necessary for tumour growth. **(d)** Colony formation assay of genetically-modified MIA PaCa-2 cells plated at 300 cells per 6cm tissue-culture dish in high glucose (25mM) DMEM and grown in normoxia or hypoxia (0.5% O<sub>2</sub>) for two weeks. Colonies were stained with 0.25% crystal violet in ethanol and counted. (mean  $\pm$  SD, one-way

ANOVA, \*  $p < 0.05$ ) **(e)** Colony formation assay of genetically-modified SU.86.86 cells plated and grown under the same conditions as (d). (mean  $\pm$  SD, two-tailed Student's t-test, \*  $p < 0.05$ ) (d) and (e) showing that PDHK1 is advantageous for cell growth under hypoxic conditions.

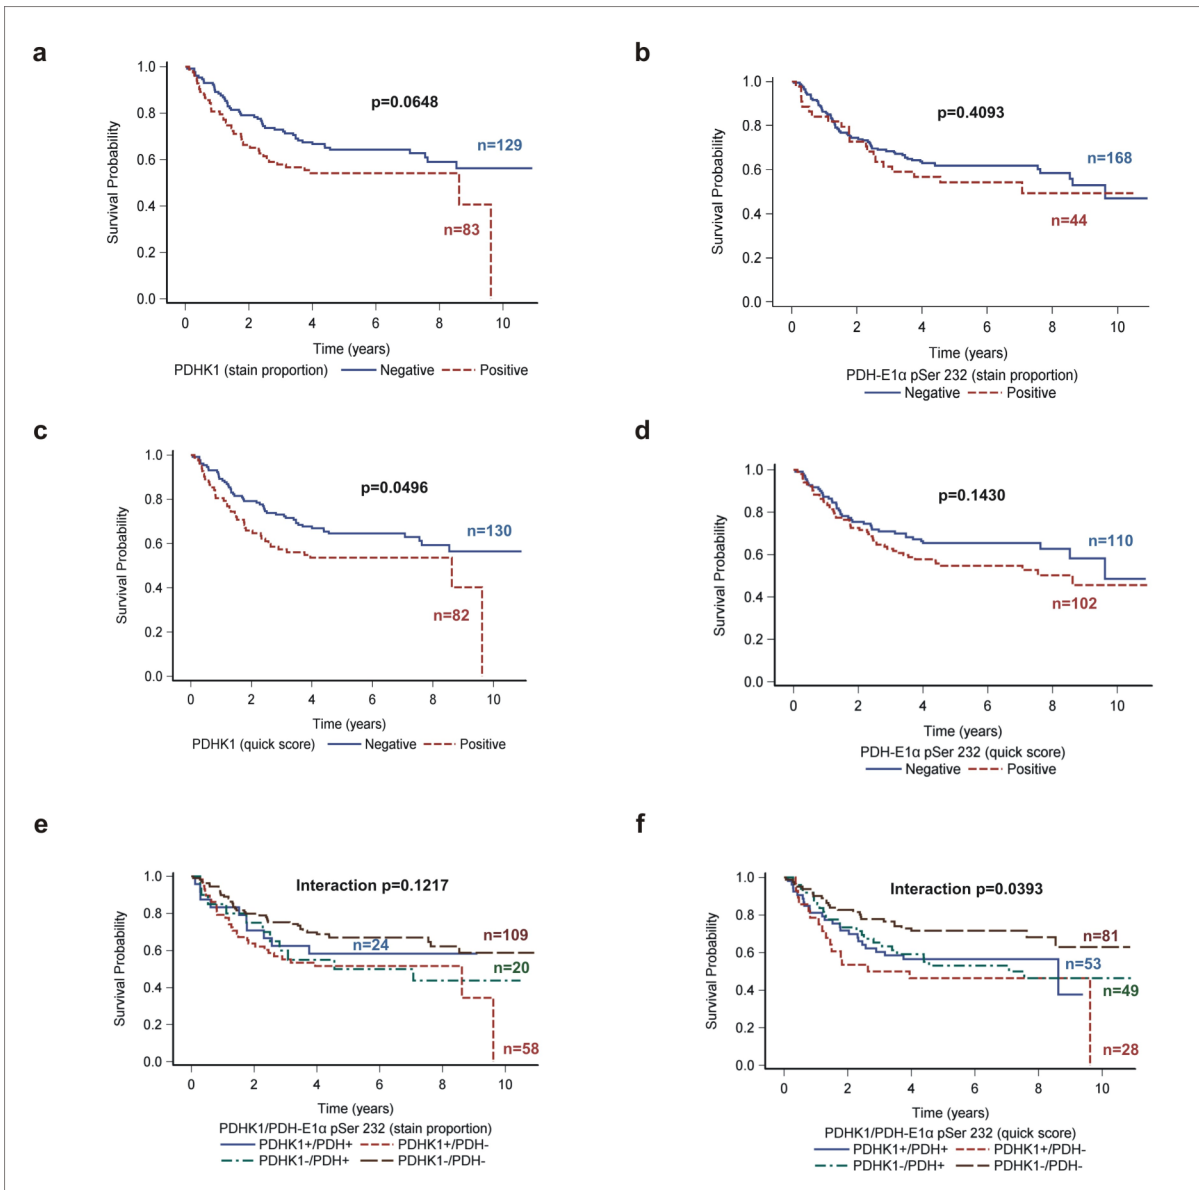

**Supplementary Figure S3** Univariate Kaplan Meier survival curves and significance of difference based on scored parameters of the TMA. **(a)** PDHK1 stain proportion **(b)** pSer232-E1α stain proportion **(c)** PDHK1 quick score **(d)** pSer232-E1α quick score. Dual parameter analyses for **(e)** stain proportion and **(f)** quick score.
